# Supplementary material
Source: publisher site journal article supplement (https://www.dovepress.com/get_supplementary_file.php?f=178056.xlsx)
Supplement: Supplementary file 1 [file get_supplementary_file.php]

## Sheet: 1. Crohn's Outpatient
PRE-DIAGNOSIS ICD-9 CODES FOR OUTPATIENT VISITS (CROHN'S)
Adult IBD		Pediatric IBD
280: Anemia, iron deficiency - 1 year prior to diagnosis		280: Anemia, iron deficiency <1 year prior to diagnosis
364: Iridocyclitis (uveitis NOS)
379: Scleritis & episcleritis
528: Oral aphthae (1 year prior to diagnosis)
560: Intestinal obstruction		560: Intestinal obstruction
565: Anal fistula		565: Anal fistula
566: Anal abscess		566: Anal abscess
569: 1 year prior to diagnosis - Rectal/anal hemorrhage, Other disorder of rectum/anus (including: ulcer, pain, sphincter tear (healed), dysplasia, other specified including proctitis, inflammation), abscess of the intestine, Other disorders of intestine (including: fistula (excluding rectum), ulcer of intestine, perforation, angiodysplasia (no haemorrhage), angiodysplasia (with haemorrhage), Die…		569: 1 year prior to diagnosis - Rectal/anal hemorrhage, Other disorder of rectum/anus (including: ulcer, pain, sphincter tear (healed), dysplasia, other specified including proctitis, inflammation), abscess of the intestine, Other disorders of intestine (including: fistula (excluding rectum), ulcer of intestine, perforation, angiodysplasia (no haemorrhage), angiodysplasia (with haemorrhage), Die…
576: Primary sclerosing cholangitis		576: Primary sclerosing cholangitis
579: Malabsorption - 1 year prior to diagnosis		579: Malabsorption - 1 year prior to diagnosis
686: Pyoderma, pyoderma granuloma of the skin and soft tissue		686: Pyoderma, pyoderma granuloma of the skin and soft tissue
695: Erythema nodosum		695: Erythema nodosum
720: Inflammatory spondylopathies (including: ankylosing spondylitis, spinal enthesopathy, sacroiliitis, other inflammatory)
		787: 1 year prior to diagnosis - Anorexia, abdominal pain, Symptoms involving digestive system (including: nausea and vomiting, Nausea alone, vomiting alone, heartburn, dysphagia, gas/bloating, encopresis, fecal incontinence diarrhea NOS (not infectious))

## Sheet: 2. UC Outpatient
PRE-DIAGNOSIS ICD-9 CODES FOR OUTPATIENT VISITS (ULCERATIVE COLITIS)
Adult IBD		Pediatric IBD
280: Anemia, iron deficiency - 1 year prior to diagnosis		280: Anemia, iron deficiency - <1 years prior to diagnosis
280: Anemia, iron deficiency - 3 years prior to diagnosis
364: Iridocyclitis (uveitis NOS)
379: Scleritis & episcleritis
576: Primary sclerosing cholangitis		576: Primary sclerosing cholangitis
686: Pyoderma, pyoderma granuloma of the skin and soft tissue
695: Erythema nodosum		695: Erythema nodosum
720: Inflammatory spondylopathies (including: ankylosing spondylitis, spinal enthesopathy, sacroiliitis, other inflammatory)

## Sheet: 3. Crohn's Hospitalization
PRE-DIAGNOSIS ICD-9/ICD-10 CODES FOR HOSPITALIZATIONS (CROHN'S)
Adult IBD		Pediatric IBD
262.x/263.0/263.1/263.2/263.8/263.9/579.8/579.9/E43/E44/E45/E46/K90.8/K90.9: Malabsorption and malnutrition		262.x/263.0/263.1/263.2/263.8/263.9/579.8/579.9/E43/E44/E45/E46/K90.8/K90.9: Malabsorption and malnutrition
363.2/H30.9: Chorioretinitis unspecified (uveitis, posterior NOS)
364.0/H20.0: Acute and subacute iridocyclitis
364.3/H20.9: Unspecified iridocyclitis (uveitis NOS)
379.0/H15: Scleritis and episcleritis
453/I82: Venous embolism/thrombosis - 1 year prior to diagnosis
582.2/K12.0: Oral apthae - 1 year prior to diagnosis		582.2/K12.0: Oral apthae - 1 year prior to diagnosis
		535/K29.x: Gastritis/duodenitis
537.4/K31.6: Fistula of stomach and duodenum		537.4/K31.6: Fistula of stomach and duodenum
560.8/560.9/K31.5/K56.6: Intestinal obstruction		560.8/560.9/K31.5/K56.6: Intestinal obstruction
565.1/K60.3: Anal fistula		565.1/K60.3: Anal fistula
569.3/K62.5: Rectal/anal hemorrhage - 1 year prior to diagnosis		569.3/K62.5: Rectal/anal hemorrhage - 1 year prior to diagnosis
569.41/K62.6: Ulcer of the rectum.anus		569.41/K62.6: Ulcer of the rectum.anus
569.45/K62.8: Other unspecified disorder of rectum/anus (including: proctitis, inflammation)		569.45/K62.8: Other unspecified disorder of rectum/anus (including: proctitis, inflammation)
569.5/K63.0: Abscess of the intestine		569.5/K63.0: Abscess of the intestine
569.81/K63.2: Fistula of intestine (excluding rectum)		569.81/K63.2: Fistula of intestine (excluding rectum)
569.82/K63.3: Ulcer of intestine		569.82/K63.3: Ulcer of intestine
569.83/K63.1: Perforation of intestine (non-traumatic)		569.83/K63.1: Perforation of intestine (non-traumatic)
576.1/K83.0: Primary sclerosing cholangitis
593.82/N28.8: Ureteral fistula
596.2/N32.2: Vesical fistula
599.1/N36.0: Urethral fistula
619.x/N82: Fistula involving female genitourinary system
686.0/L08.0: Pyoderma		686.0/L08.0: Pyoderma
686.1/L98.0: Pyogenic granuloma of the skin and soft tissue
695.2/L52: Erythema nodosum		695.2/L52: Erythema nodosum
713.3/M14.8: Arthropathy associated with other diseases
720.0/M45/M47/: Ankylosing spondylitis
720.2/M46.1: Sacroiliitis
720.8/720.9/M46.8/M46.9/M48.x: Other spondylopathies, other MSK inflammatory disorders
		783.0/R63.0: Anorexia - 1 year prior to diagnosis
		783.2/R63.4: Abnormal weight loss - 1 year prior to diagnosis
		783.22/R62.8: Underweight - 1 year prior to diagnosis
		783.41/783.7/R62.8/R62.9: Failure to thrive - 1 year prior to diagnosis
		783.41/783.7/R62.8/R62.9: Failure to thrive - 3 years prior to diagnosis
		787.43/E34.3: Short stature - 1 year prior to diagnosis
		787.43/E34.3: Short stature - 3 years prior to diagnosis
		789.0/R10.x: Abdominal pain - 1 year prior to diagnosis
799.4/R64.x: Cachexia - 1 year prior to diagnosis		799.4/R64.x: Cachexia - 1 year prior to diagnosis

## Sheet: 4. UC Hospitalization
PRE-DIAGNOSIS ICD-9/ICD-10 CODES FOR HOSPITALIZATIONS (ULCERATIVE COLITIS)
Adult IBD		Pediatric IBD
363.2/H30.9: Chorioretinitis unspecified (uveitis, posterior NOS)
364.0/H20.0: Acute and subacute iridocyclitis
364.3/H20.9: Unspecified iridocyclitis (uveitis NOS)
379.0/H15: Scleritis and episcleritis
453/I82: Venous embolism/thrombosis - 6mo prior to diagnosis
569.3/K62.5: Rectal/anal hemorrhage - 6mo prior to diagnosis		569.3/K62.5: Rectal/anal hemorrhage - 6mo prior to diagnosis
569.41/K62.6: Ulcer of the rectum.anus
569.45/K62.8: Other unspecified disorder of rectum/anus (including: proctitis, inflammation)		569.45/K62.8: Other unspecified disorder of rectum/anus (including: proctitis, inflammation)
569.83/K63.1: Perforation of intestine (non-traumatic)
576.1/K83.0: Primary sclerosing cholangitis		576.1/K83.0: Primary sclerosing cholangitis
686.0/L08.0: Pyoderma
695.2/L52: Erythema nodosum		695.2/L52: Erythema nodosum
720.0/M45/M47/: Ankylosing spondylitis
720.2/M46.1: Sacroiliitis
720.8/720.9/M46.8/M46.9/M48.x: Other spondylopathies, other MSK inflammatory disorders
783.2/R63.4: Abnormal weight loss - 6mo prior to diagnosis		783.2/R63.4: Abnormal weight loss - 6mo prior to diagnosis
787.91/R19.4/R19.5: Diarrhea NOS or change in bowel habit - 6mo prior to diagnosis		787.91/R19.4/R19.5: Diarrhea NOS or change in bowel habit - 6mo prior to diagnosis
		789.0/R10.x: Abdominal pain - 6mo prior to diagnosis
